# Supplementary material for: Molecular and Kinetic Analyses of Circulating Tumor Cells as Predictive Markers of Treatment Response in Locally Advanced Rectal Cancer Patients
Source: PubMed Central journal article supplement (PMC6679115; doi:10.3390/cells8070641), 2019-06-26
Supplement: cells-08-00641-s001.pdf [file cells-08-00641-s001.pdf]

Table 1. table of sensitivity, specificity and predictive values of biomarkers evaluated.

| <b>Biomarker</b>                  | <b>Sensitivity (%)</b> | <b>Specificity (%)</b> | <b>Positive Predictive Value (%)</b> | <b>Negative Predictive Value (%)</b> | <b><i>p</i> value</b> |
|-----------------------------------|------------------------|------------------------|--------------------------------------|--------------------------------------|-----------------------|
| <b>CISH TYMS before NCRT</b>      | 83.3                   | 83.3                   | 95.2                                 | 55.5                                 | 0.001                 |
| <b>TYMS protein before NCRT</b>   | 83.3                   | 25                     | 85.7                                 | 21.7                                 | 0.66                  |
| <b>RAD23B protein before NCRT</b> | 66.6                   | 45.8                   | 84.6                                 | 23.5                                 | 0.58                  |
| <b>CISH TYMS after NCRT</b>       | 75                     | 68.2                   | 93.8                                 | 30                                   | 0.102                 |
| <b>TYMS protein after NCRT</b>    | 100                    | 50                     | 100                                  | 28.6                                 | 0.064                 |
| <b>RAD23B protein after NCRT</b>  | 100                    | 70                     | 100                                  | 40                                   | 0.01                  |
